# Supplementary material for: Bright luminescence of new low-melting copper(i) chlorides with compact organic cations
Source: Royal Society of Chemistry journal article supplement (doi:10.1039/d4tc02152e), 2024-01-01
Supplement: d4tc02152e1.pdf [file d4tc02152e1.pdf]

Electronic Supplementary information for the article

## Bright luminescence of new low-melting copper(I) chlorides with compact organic cations

Daria E. Belikova<sup>a</sup>, Sergey A. Fateev<sup>a</sup>, Victor N. Khrustalev<sup>bc</sup>, Vladislava Y. Kozhevnikova<sup>d</sup>, Artem A. Ordinartsev<sup>a</sup>, Alexander V. Dzuban<sup>d</sup>, Eugene A. Goodilin<sup>ad</sup>, Alexey B. Tarasov<sup>ad†</sup>

a. Laboratory of New Materials for Solar Energetics, Faculty of Materials Science, Lomonosov Moscow State University, 119991 Moscow, Russian Federation.

b. Inorganic Chemistry Department, Peoples' Friendship University of Russia (RUDN University), 117198 Moscow, Russian Federation.

c. Zelinsky Institute of Organic Chemistry, Russian Academy of Sciences, Leninsky Prosp. 47, Moscow 119991, Russia.

d. Department of Chemistry, Lomonosov Moscow State University, 119991 Moscow, Russian Federation

† These authors have contributed equally.

\* Corresponding author: [alexey.bor.tarasov@yandex.ru](mailto:alexey.bor.tarasov@yandex.ru)

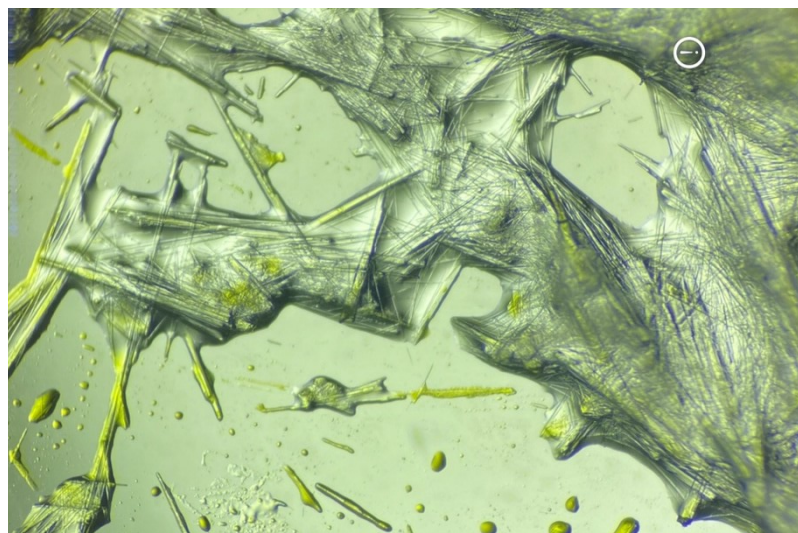

Figure S1. Photo of synthesized  $\text{AcCuCl}_2$  needle-like crystals in optical microscope.

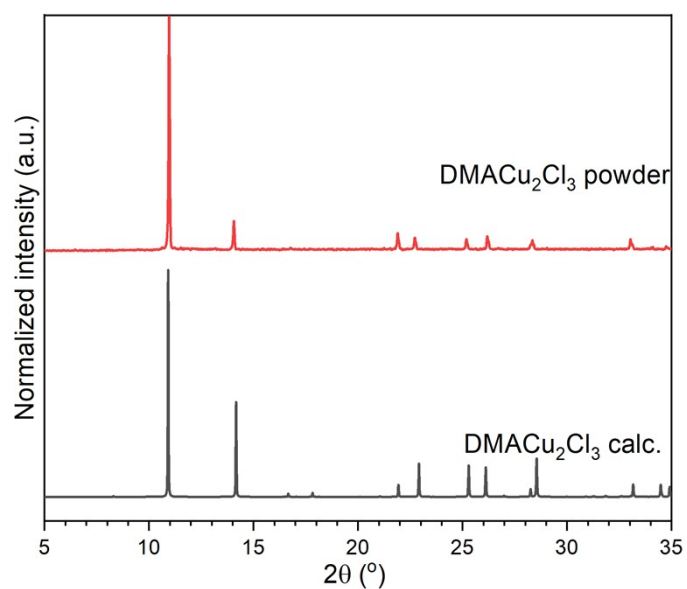

Figure S2. XRD pattern of the synthesized  $\text{DMACu}_2\text{Cl}_3$  powder in comparison with the calculated pattern.

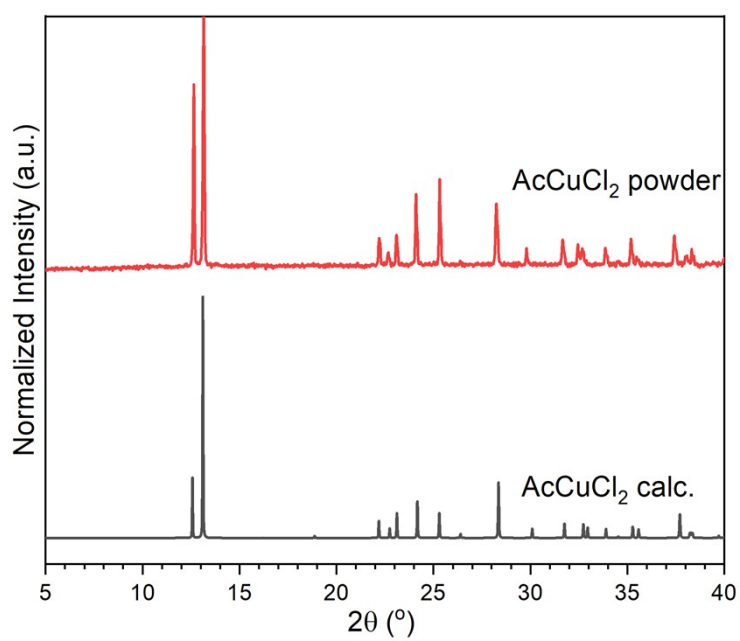

Figure S3. XRD pattern of the synthesized  $\text{AcCuCl}_2$  powder in comparison with the calculated pattern.

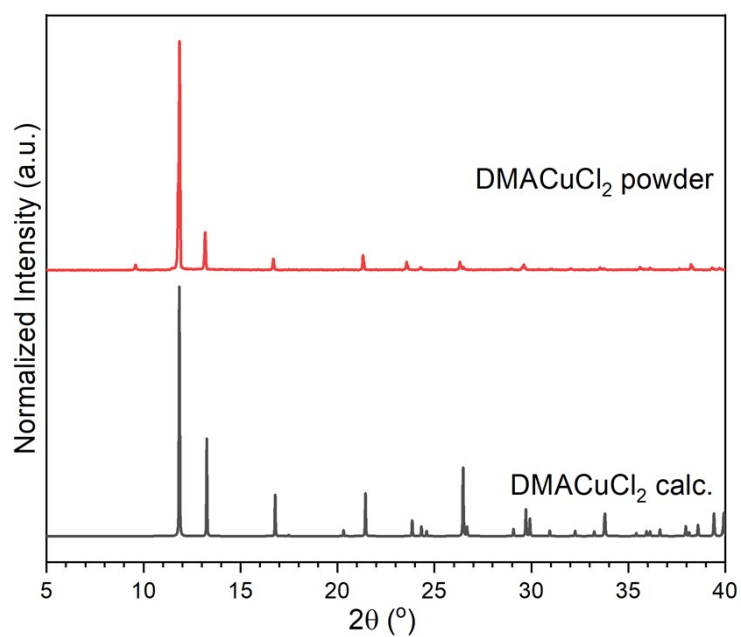

Figure S4. XRD pattern of the synthesized  $\text{DMACuCl}_2$  powder in comparison with the calculated pattern.

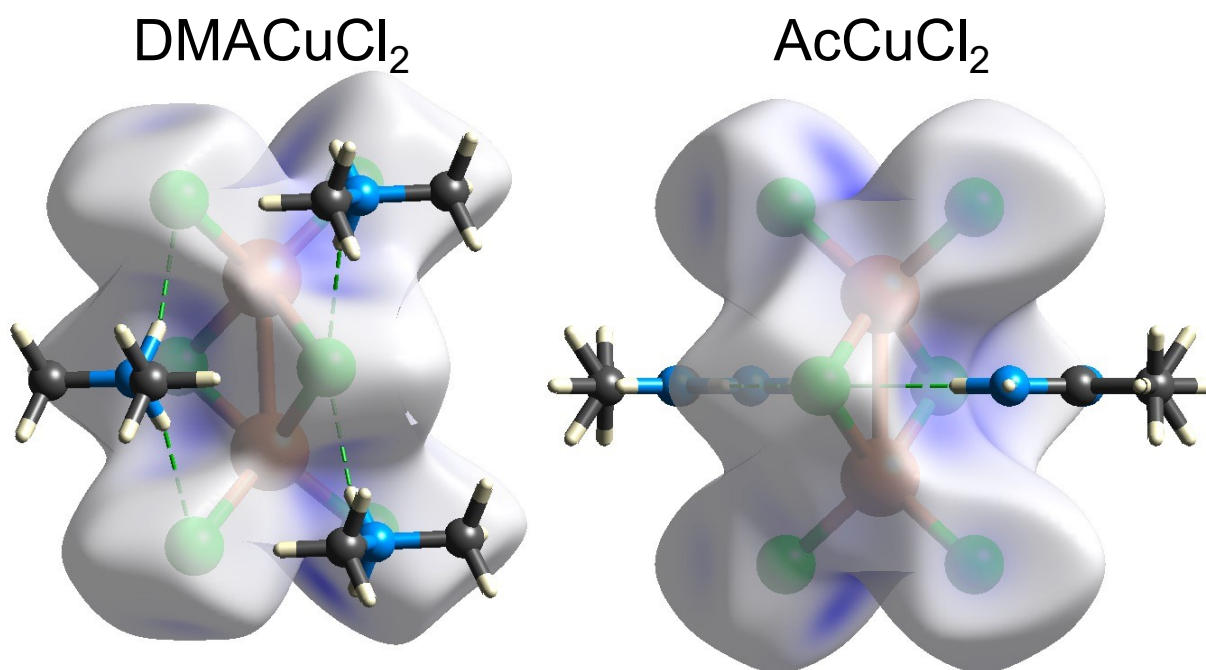

Figure S5. Hirschfeld surfaces of the elementary units of the inorganic framework for  $\text{DMACuCl}_2$  and  $\text{AcCuCl}_2$  phases.

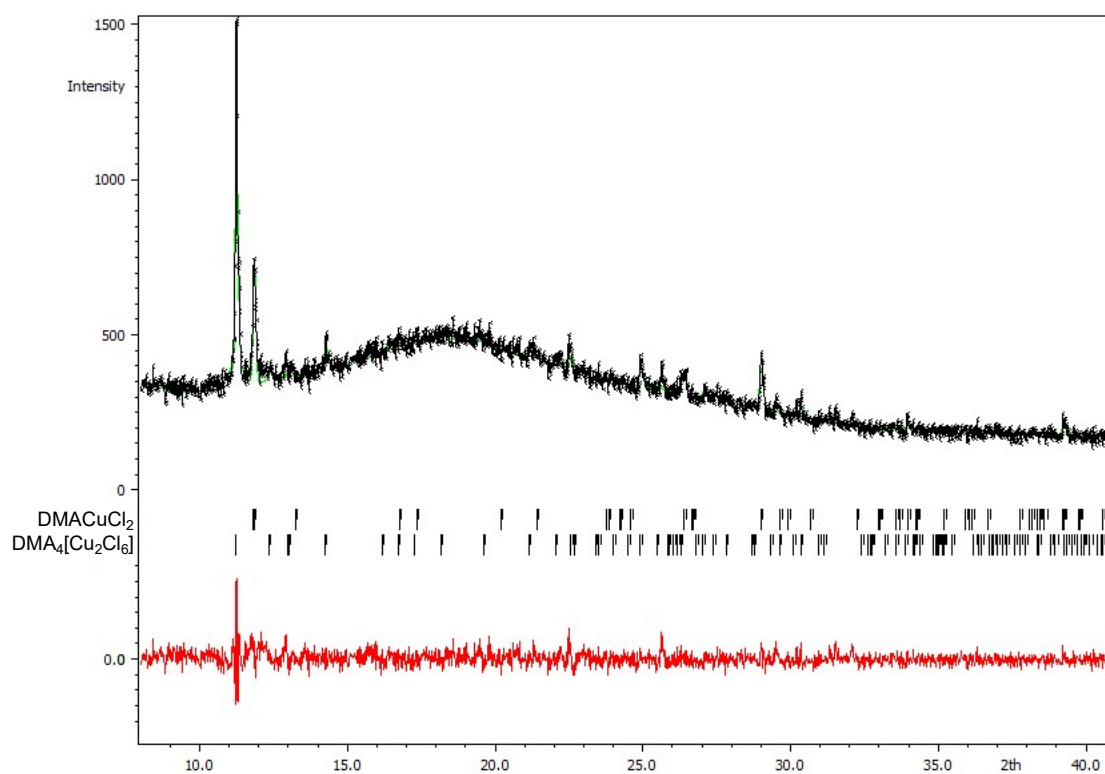

Figure S6. Refined XRD pattern of DMA<sub>4</sub>[Cu<sub>2</sub>Cl<sub>6</sub>]. The black and green curves represent the experimental data and the calculated profile, respectively. The difference curve is plotted in red at the bottom of the pattern. Phase #1 and Phase #2 correspond to DMA<sub>4</sub>[Cu<sub>2</sub>Cl<sub>6</sub>] and DMACuCl<sub>2</sub> phases, respectively.

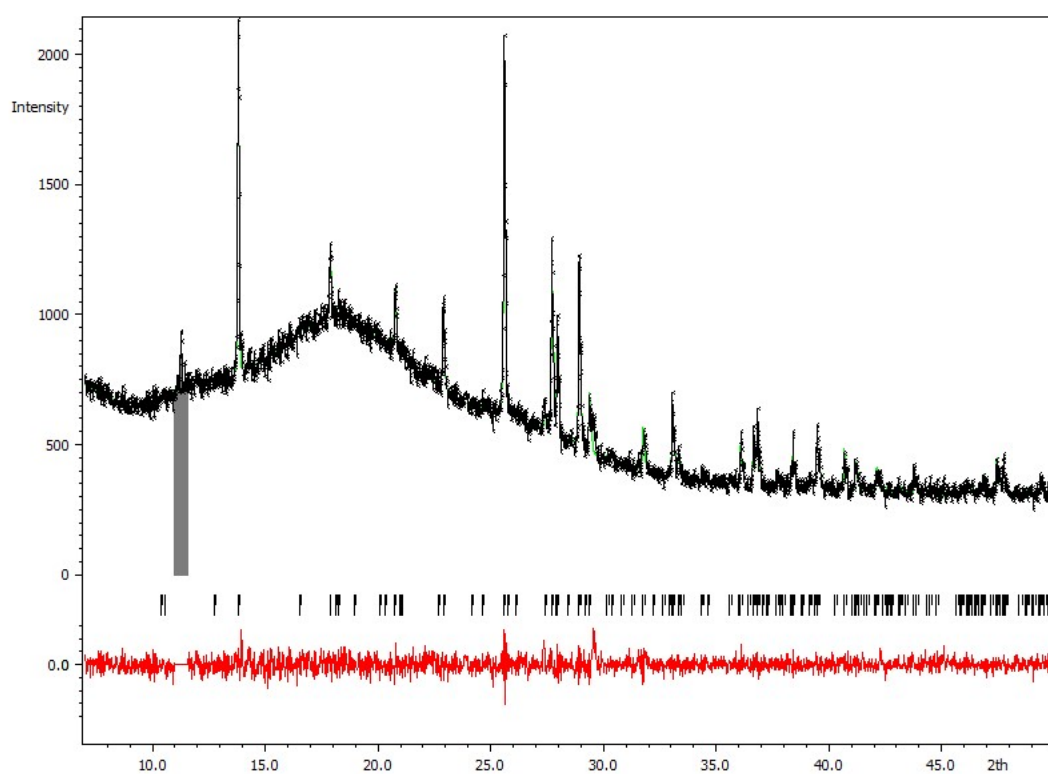

Figure S7. Refined XRD pattern of  $\text{DMA}_3\text{CuCl}_4$ . The black and green curves represent the experimental data and the calculated profile, respectively. The difference curve is plotted in red at the bottom of the pattern. The excluded reflex corresponds to the  $\text{DMA}_4[\text{Cu}_2\text{Cl}_6]$  phase.

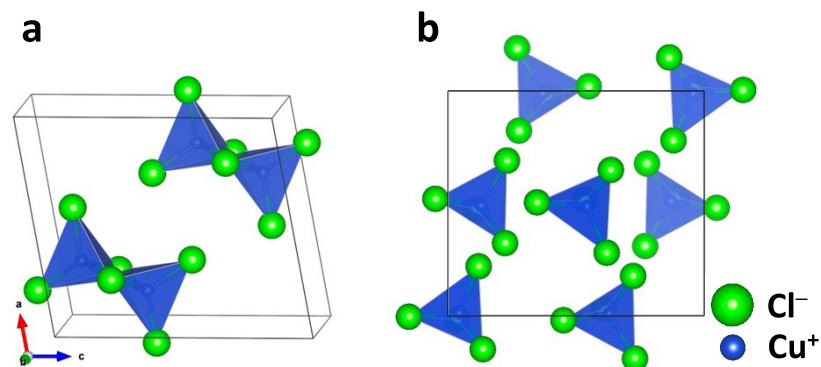

Figure S8. Models of anionic frameworks for a)  $\text{DMA}_4[\text{Cu}_2\text{Cl}_6]$  and b)  $\text{DMA}_3\text{CuCl}_4$  phases.

Table S1. Bond length distortion index and bond angle dispersion values for the studied phases.

| Phase                                 | Cu-Cl bond length, Å                             | Distortion index (bond length) | Cl-Cu-Cl angles, deg.                                                                | Bond angle variance, deg. <sup>2</sup> | Shortest Cl...H distance**, Å |
|---------------------------------------|--------------------------------------------------|--------------------------------|--------------------------------------------------------------------------------------|----------------------------------------|-------------------------------|
| $\text{DMA}_{\text{Cu}_2\text{Cl}_3}$ | 2.2852(5)<br>2.2781(5)<br>2.5389(5)<br>2.4436(5) | 0.044                          | 128.26(3)<br>109.964(17)<br>105.217(17)<br>105.145(19)<br>103.572(17)<br>102.425(17) | 94.88                                  | 2.57(3)                       |
| $\text{DMA}_{\text{CuCl}_2}$          | 2.2583(5)<br>2.5540(6)<br>2.2583(5)<br>2.5540(6) | 0.062                          | 137.54(4)<br>107.500(19)<br>107.500(19)<br>101.361(15)<br>101.361(15)<br>93.19(3)    | 238.43                                 | 2.2961(3)                     |
| $\text{AcCuCl}_2$                     | 2.3598(7)<br>2.3762(6)<br>2.3762(6)<br>2.3598(7) | 0.00347                        | 113.100(8)<br>113.100(8)<br>113.100(8)<br>113.100(8)<br>104.16(3)<br>100.65(3)       | 31.74                                  | 2.54(3)                       |

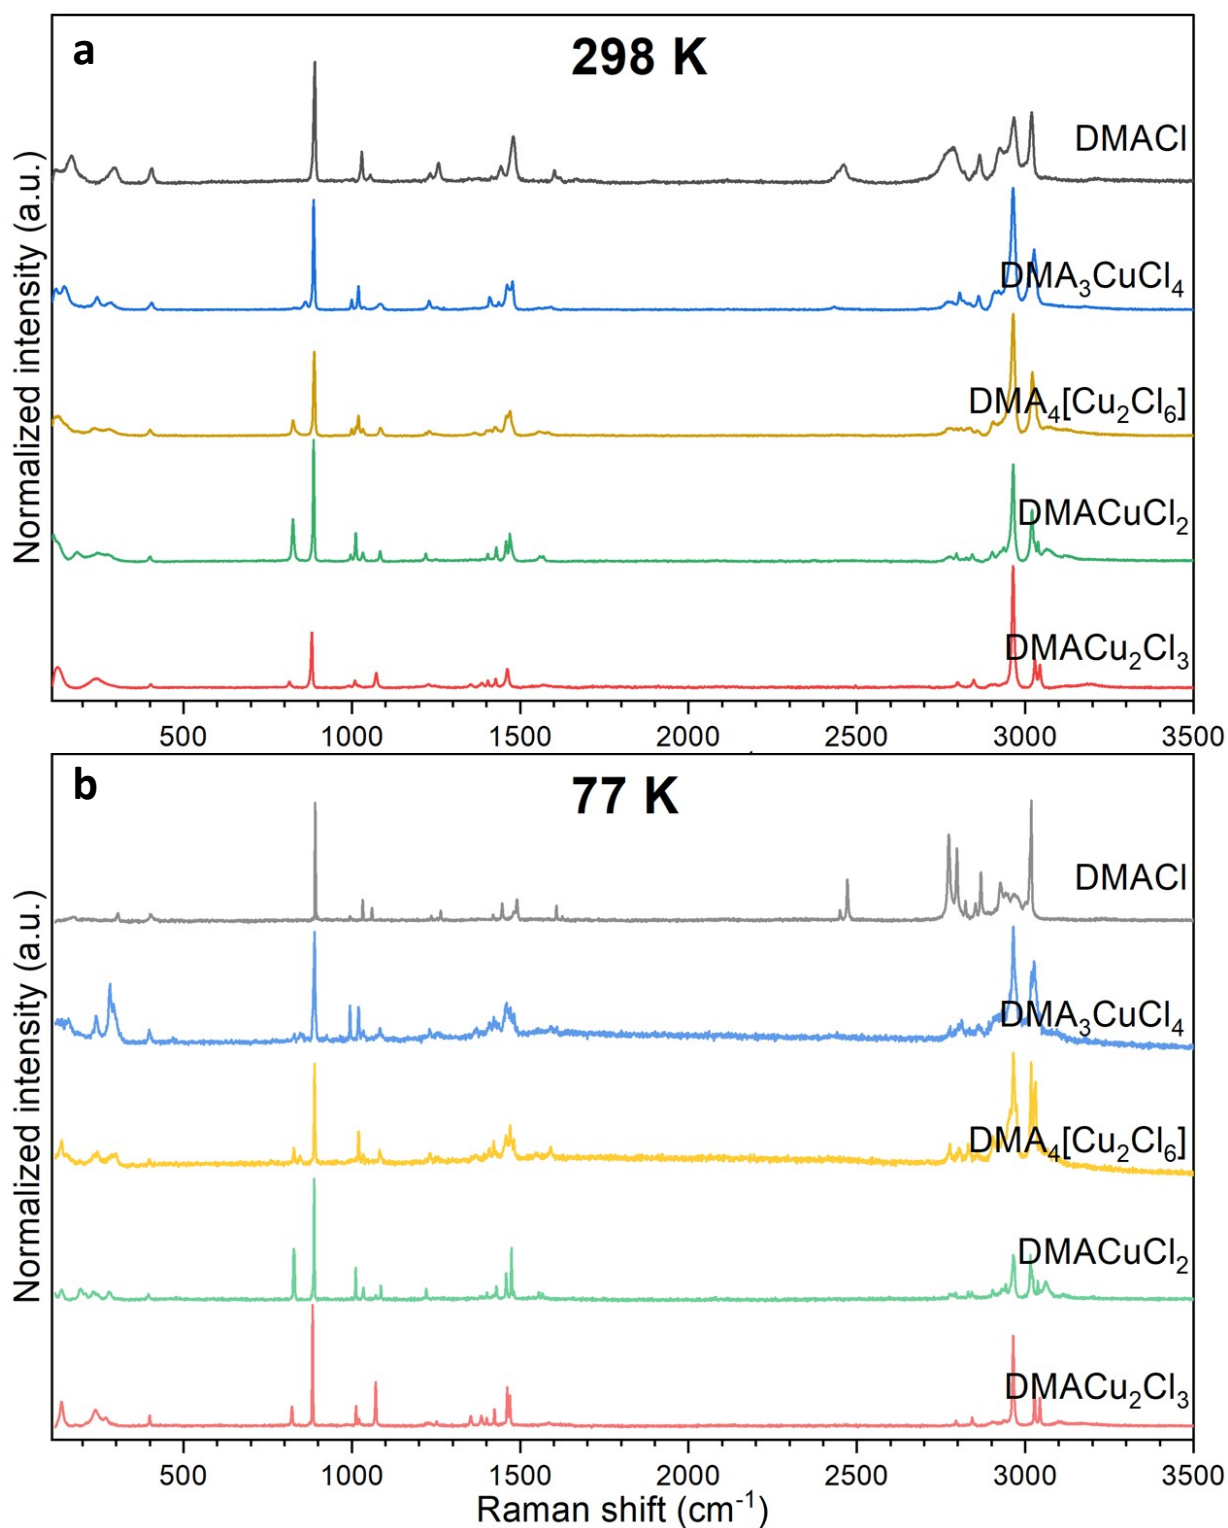

Figure S9. Raman spectra of studied hybrid copper(I) halides with DMA<sup>+</sup> cation recorded at a) room temperature and b) 77 K.

## Analysis of the Raman spectra

Based on existing data on Raman modes of other hybrid halometallates with dimethylammonium cations<sup>1-3</sup>, we interpreted the strong modes in the fingerprint region of the spectra as NC<sub>2</sub> scissoring at 401 – 406 cm<sup>-1</sup> (NC<sub>2</sub> δ<sub>sc</sub>), NH<sub>2</sub><sup>+</sup> rocking at 814 – 862 cm<sup>-1</sup> (NH<sub>2</sub><sup>+</sup> δ<sub>r</sub>), symmetrical and asymmetrical NC<sub>2</sub> stretching at 881 – 890 cm<sup>-1</sup> (NC<sub>2</sub> v<sub>s</sub>) and 993 – 1084 cm<sup>-1</sup> (N-C v<sub>as</sub>), respectively. Other present modes correspond to NC<sub>2</sub> wagging and twisting at 1219 – 1257 cm<sup>-1</sup> (NC<sub>2</sub> δ<sub>w</sub>, δ<sub>t</sub>), NH<sub>2</sub><sup>+</sup> wagging at 1350 – 1425 cm<sup>-1</sup> (NH<sub>2</sub><sup>+</sup> δ<sub>w</sub>) and CH<sub>3</sub> angle-bending deformation at 1450 – 1500 cm<sup>-1</sup> (CH<sub>3</sub> δ<sub>b</sub>). In the 2700 – 3200 cm<sup>-1</sup> region we observe four typical areas corresponding to symmetrical (v<sub>s</sub>) and asymmetrical (v<sub>as</sub>) CH<sub>3</sub> and NH<sub>2</sub><sup>+</sup> stretching. Full list of interpreted peaks is presented in Table S2.

Table S2. Models of anionic frameworks for a) DMA<sub>4</sub>[Cu<sub>2</sub>Cl<sub>6</sub>] and b) DMA<sub>3</sub>CuCl<sub>4</sub> phases.

| Vibrational frequency, cm <sup>-1</sup> |         |                                    |         |                                    |         |                      |         |                                    |         | Assignment                                               |
|-----------------------------------------|---------|------------------------------------|---------|------------------------------------|---------|----------------------|---------|------------------------------------|---------|----------------------------------------------------------|
| DMACl                                   |         | DMA <sub>3</sub> CuCl <sub>4</sub> |         | DMA <sub>2</sub> CuCl <sub>3</sub> |         | DMACuCl <sub>2</sub> |         | DMACu <sub>2</sub> Cl <sub>3</sub> |         |                                                          |
| 298 K                                   | 77 K    | 298 K                              | 77 K    | 298 K                              | 77 K    | 298 K                | 77 K    | 298 K                              | 77 K    |                                                          |
| 169 w                                   | 173 w   | 146 m                              | 158 w   | 129 w                              | 242 w   | 131 w                | 137 w   | 128 w                              | 137 m   | lattice modes                                            |
| 295 w                                   | 305 w   | 243 w                              | 240 w   | 236 w                              | 289 w   | 184 w                | 194 w   | 239 w                              | 238 w   |                                                          |
|                                         |         | 283 w                              | 282 m   | 279 w                              |         | 254 w                | 231 w   |                                    | 267 w   |                                                          |
| 406 w                                   | 401 w   | 405 w                              | 398 w   | 400 w                              | 397 w   | 401 vw               | 395 w   | 403 vw                             | 400 w   | NC <sub>2</sub> scissoring δ <sub>sc</sub>               |
|                                         |         | 863 w                              | 828 vw  | 825 w                              | 827 w   | 825 m                | 828 m   | 815 w                              | 822 w   | NH <sub>2</sub> <sup>+</sup> rocking δ <sub>r</sub>      |
|                                         |         | 847 vw                             | 847 vw  |                                    | 846 vw  |                      |         |                                    |         |                                                          |
| 890 s                                   | 891 s   | 886 s                              | 889 s   | 888 s                              | 889 s   | 886 s                | 888 s   | 881 m                              | 883 s   | symmetrical NC <sub>2</sub> stretching v <sub>s</sub>    |
| 1002 vw                                 | 1011 w  | 999 w                              | 994 m   | 999 vw                             | 1000 vw | 996 vw               | 1011 m  | 1008 vw                            | 1012 w  | asymmetrical NC <sub>2</sub> stretching v <sub>as</sub>  |
| 1029 w                                  | 1020 vw | 1019 w                             | 1020 m  | 1012 w                             | 1012 vw | 1012 m               | 1035 w  |                                    | 1021 vw |                                                          |
| 1054 w                                  | 1032 w  | 1035 vw                            | 1036 w  | 1019 vw                            | 1020 m  | 1032 w               |         |                                    |         |                                                          |
|                                         | 1060 w  | 1084 w                             | 1085 w  | 1085 w                             | 1083 w  | 1084 w               | 1072 vw | 1073 w                             | 1071 m  |                                                          |
|                                         |         |                                    |         |                                    |         |                      | 1086 w  |                                    |         |                                                          |
| 1232 w                                  | 1236 vw | 1229 w                             | 1229 w  | 1231 vw                            | 1232 w  | 1219 w               | 1220 w  | 1228 vw                            | 1229 vw | NC <sub>2</sub> wagging δ <sub>w</sub>                   |
| 1258 w                                  | 1246 vw | 1253 vw                            | 1256 vw | 1250 vw                            | 1252 vw | 1249 w               |         | 1246 vw                            | 1252 vw | NC <sub>2</sub> twisting δ <sub>t</sub>                  |
| 1442 w                                  | 1419 vw | 1371 vw                            | 1367 w  | 1402 vw                            | 1369 vw | 1403 w               | 1400 vw | 1353 vw                            | 1352 w  | NH <sub>2</sub> <sup>+</sup> wagging δ <sub>w</sub>      |
|                                         | 1446 w  | 1409 w                             | 1380 vw | 1413 vw                            | 1393 vw | 1429 w               | 1430 w  | 1388 vw                            | 1384 w  |                                                          |
|                                         |         | 1436 vw                            | 1393 vw | 1424 vw                            | 1406 w  |                      |         | 1403 vw                            | 1400 vw |                                                          |
|                                         |         |                                    | 1408 w  | 1427 vw                            | 1420 w  |                      |         | 1429 vw                            | 1423 w  |                                                          |
|                                         |         |                                    | 1421 vw |                                    |         |                      |         |                                    |         |                                                          |
|                                         |         |                                    | 1427 vw |                                    |         |                      |         |                                    |         |                                                          |
|                                         |         |                                    | 1437 vw |                                    |         |                      |         |                                    |         |                                                          |
| 1479 m                                  | 1481 vw | 1460 w                             | 1457 m  | 1458 w                             | 1457 w  | 1459 w               | 1459 w  | 1460 w                             | 1461 m  | CH <sub>3</sub> angle-bending deformation δ <sub>b</sub> |
|                                         | 1490 w  | 1477 w                             | 1465 w  | 1470 w                             | 1470 m  | 1470 w               | 1473 m  |                                    | 1469 m  |                                                          |
|                                         |         |                                    | 1471 w  |                                    | 1481 w  |                      | 1481 vw |                                    |         |                                                          |
|                                         |         |                                    | 1476 w  |                                    |         |                      |         |                                    |         |                                                          |
|                                         |         |                                    | 1482 w  |                                    |         |                      |         |                                    |         |                                                          |
|                                         |         |                                    | 1491 w  |                                    |         |                      |         |                                    |         |                                                          |
| 1602 w                                  | 1607 w  | 1554 vw                            | 1546 w  | 1554 vw                            | 1549 vw | 1559 vw              | 1555 vw | 1567 vw                            | 1785 vw | NH <sub>2</sub> <sup>+</sup> scissoring δ <sub>s</sub>   |
| 1619 w                                  | 1625 vw | 1591 vw                            |         | 1584 vw                            |         | 1569 vw              | 1565 vw |                                    |         |                                                          |
| 2461 m                                  | 2449 w  |                                    |         |                                    |         |                      |         |                                    |         | ?                                                        |
|                                         | 2471 m  |                                    |         |                                    |         |                      |         |                                    |         |                                                          |
| 2786 m                                  | 2772 s  | 2805 w                             | 2802 vw | 2802 w                             | 2775 w  | 2794 w               | 2780 vw | 2800 w                             | 2794 vw | symmetrical CH <sub>3</sub>                              |
| 2865 m                                  | 2797 s  | 2861 w                             | 2810 vw | 2861 w                             | 2803 w  | 2843 w               | 2793 vw | 2861 w                             | 2842 vw |                                                          |

|        |                                       |                  |                   |                  |                            |                  |                              |                  |                   |                                                               |
|--------|---------------------------------------|------------------|-------------------|------------------|----------------------------|------------------|------------------------------|------------------|-------------------|---------------------------------------------------------------|
|        | 2823 w<br>2831 vw<br>2852 w<br>2868 m |                  | 2862 vw           |                  | 2832 w<br>2857 w           |                  | 2831 vw<br>2842 vw           |                  |                   | stretching $\nu_s$ ,<br>overtone of<br>$\text{CH}_3 \delta_b$ |
| 2923 m | 2910 vw<br>2925 m                     | 2905 w           | 2892 vw<br>2911 w | 2904 w           | 2909 w<br>2934 w           | 2901 w           | 2904 vw<br>2929 vw<br>2940 w | 2905 vw          | 2902 vw           | symmetrical<br>$\text{NH}_2^+$<br>stretching $\nu_s$          |
| 2966 m | 2945 w<br>2968 w                      | 2963 s           | 2963 s<br>2984 vw | 2963 s           | 2955 m<br>2966 s<br>2973 m | 2964 s           | 2965 s                       | 2964 s           | 2937 vw<br>2964 s | asymmetrical<br>$\text{CH}_3$<br>stretching $\nu_{as}$        |
| 3019 m | 3001 w<br>3019 s                      | 3014 m<br>3026 m | 3018 m<br>3026 m  | 3020 m<br>3030 m | 3017 s<br>3029 s           | 3020 m<br>3038 w | 3015 s<br>3020 m<br>3039 w   | 3028 m<br>3043 w | 3028 m<br>3043 w  | asymmetrical<br>$\text{NH}_2^+$<br>stretching $\nu_{as}$      |



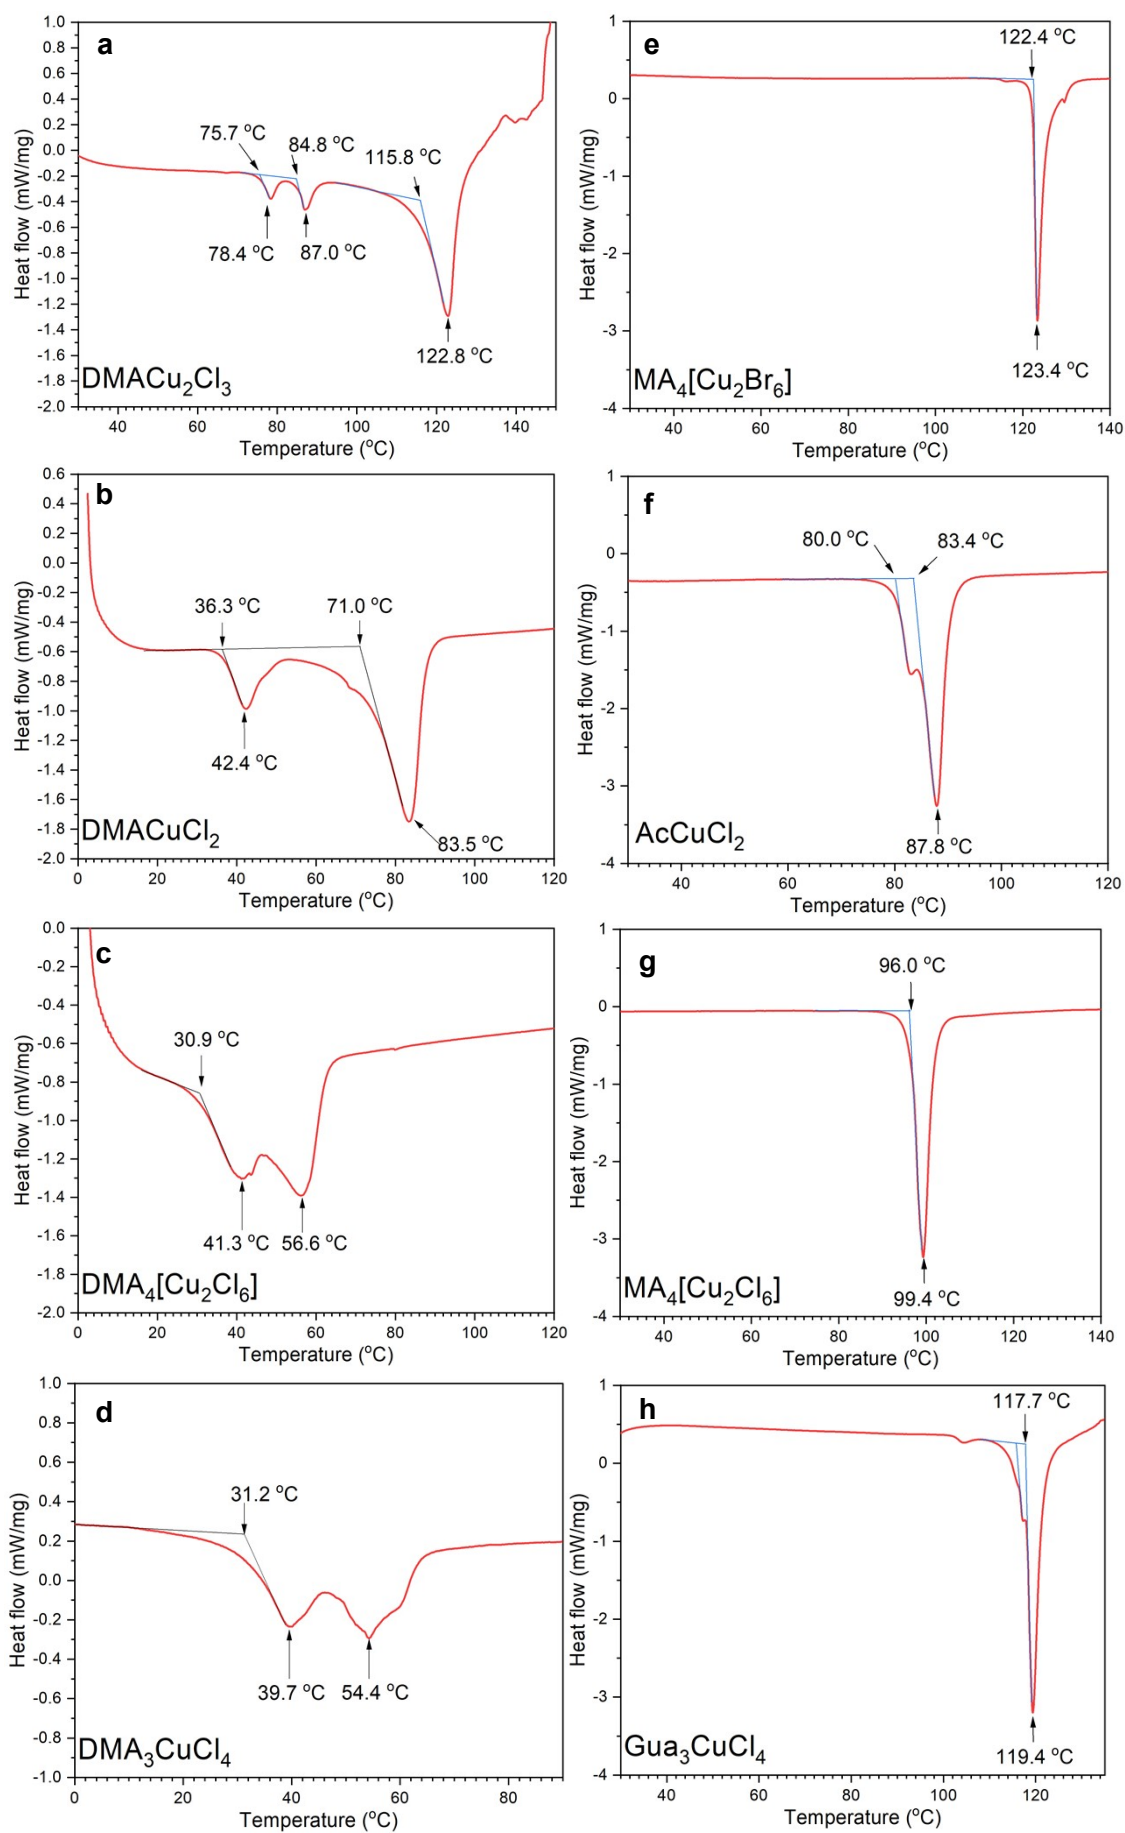

Figure S10. Differential scanning calorimetry heating curves for the studied phases of hybrid copper(I) halides.

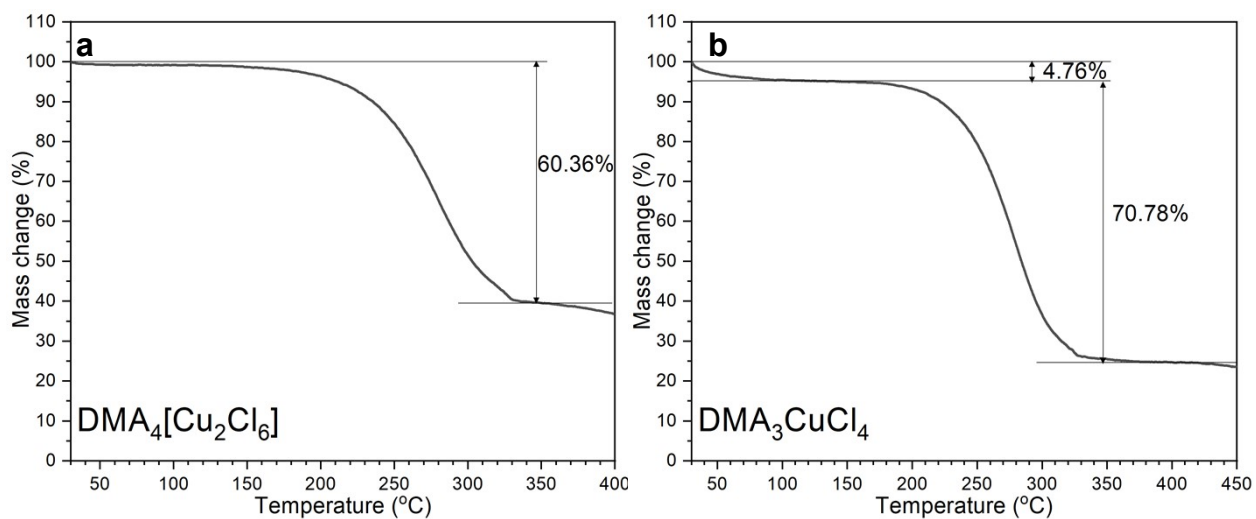

Figure S11. Thermogravimetric curves for melt-processed a) DMA<sub>4</sub>[Cu<sub>2</sub>Cl<sub>6</sub>] (theoretical mass change is 62.22%) and b) DMA<sub>3</sub>CuCl<sub>4</sub> (theoretical mass change is 71.18%).

### References

- 1 J. T. Edsall, *J. Chem. Phys.*, 2004, **5**, 225–237.
- 2 G. Bator, R. Jakubas, J. Lefebvre and Y. Guinet, *Vib. Spectrosc.*, 1998, **18**, 203–210.
- 3 M. Wojtaś, G. Bator and J. Baran, *Vib. Spectrosc.*, 2003, **33**, 143–152.
